# Supplementary material for: Distribution Characteristics and Source Analysis of Nitrogen and Phosphorus in Different Rivers in Two Water Period: A Case Study of Pi River and Shiting River in the Upper Reaches of Tuo River in China
Source: MDPI journal article supplement (doi:10.3390/ijerph191912433), 2022-09-29
Supplement: s1 [file s1]

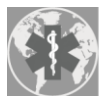

## The Standards and Specification of Surface Water Environmental Quality, Eutrophication and Pollution Degree of Nitrogen and Phosphorus in Sediments

**Table S1.** The standard of surface water environmental quality in China.

| Standard Value          | Class I | Class II    | Class III   | Class IV    | Class V     |
|-------------------------|---------|-------------|-------------|-------------|-------------|
| TP(mg·L <sup>-1</sup> ) | ≤0.010  | 0.010~0.025 | 0.025~0.050 | 0.050~0.100 | 0.100~0.200 |
| TN(mg·L <sup>-1</sup> ) | ≤0.200  | 0.200~0.500 | 0.500~1.00  | 1.00~1.50   | 1.50~2.00   |

**Table S2.** Specification for eutrophication investigation in China.

| Standard Value          | Hypotrophic Type | Medium Trophic Type | Eutrophic Type | Heavy Eutrophic Type |
|-------------------------|------------------|---------------------|----------------|----------------------|
| TP(mg·L <sup>-1</sup> ) | <0.020           | 0.020~0.050         | 0.050~0.090    | >0.090               |
| TN(mg·L <sup>-1</sup> ) | <0.250           | 0.250~0.700         | 0.700~1.30     | >1.30                |

**Table S3.** Evaluation standard of nitrogen and phosphorus pollution in sediments.

| Evaluation Criterion                                  | Content of STP (mg·kg <sup>-1</sup> ) | Content of STP (mg·kg <sup>-1</sup> ) | Pollution Degree           |
|-------------------------------------------------------|---------------------------------------|---------------------------------------|----------------------------|
| The standards formulated by the US EPA                | <420                                  | <1000                                 | Mildly polluted            |
|                                                       | 420~650                               | 1000~2000                             | Moderately polluted        |
|                                                       | >650                                  | >2000                                 | Severely polluted          |
| The standards formulated by Environment Canada (DOEE) | <600                                  | <550                                  | Safety ecotoxic effect     |
|                                                       | 600~2000                              | 550~4800                              | The lowest ecotoxic effect |
|                                                       | >2000                                 | <4800                                 | Serious ecotoxic effect    |

## Experimental Data in This Study

Table S4. The concentrations of total nitrogen and phosphorus and their fractions concentration in water.

| Water Period      | Sampling Point | Total Phosphorus and Phosphorus Fractions in Water (mg·L <sup>-1</sup> ) |       |       |       |        |        |        | Total Nitrogen and Nitrogen Fractions in Water (mg·L <sup>-1</sup> ) |                    |                                 |                    |       |
|-------------------|----------------|--------------------------------------------------------------------------|-------|-------|-------|--------|--------|--------|----------------------------------------------------------------------|--------------------|---------------------------------|--------------------|-------|
|                   |                | WTP                                                                      | DP    | PP    | DIP   | DOP    | PIP    | POP    | WTN                                                                  | NO <sub>3</sub> -N | NH <sub>4</sub> <sup>+</sup> -N | NO <sub>2</sub> -N | ON    |
| In the dry season | A1             | 0.0540                                                                   | 0.021 | 0.033 | 0.010 | 0.011  | 0.025  | 0.0081 | 2.91                                                                 | 1.08               | 0.24                            | 0.0085             | 1.58  |
|                   | A2             | 0.0723                                                                   | 0.042 | 0.030 | 0.037 | 0.0050 | 0.013  | 0.017  | 2.97                                                                 | 1.06               | 0.415                           | 0.016              | 1.48  |
|                   | A3             | 0.0394                                                                   | 0.028 | 0.012 | 0.026 | 0.0018 | 0.0077 | 0.0038 | 2.91                                                                 | 1.01               | 0.436                           | 0.017              | 1.45  |
|                   | A4             | 0.0964                                                                   | 0.025 | 0.071 | 0.019 | 0.0063 | 0.018  | 0.053  | 5.08                                                                 | 1.72               | 0.824                           | 0.025              | 2.52  |
|                   | A5             | 0.137                                                                    | 0.028 | 0.11  | 0.018 | 0.011  | 0.074  | 0.035  | 6.61                                                                 | 2.34               | 0.759                           | 0.030              | 3.49  |
|                   | A6             | 0.123                                                                    | 0.032 | 0.091 | 0.028 | 0.0038 | 0.023  | 0.068  | 7.06                                                                 | 2.47               | 0.878                           | 0.030              | 3.68  |
|                   | A7             | 0.195                                                                    | 0.039 | 0.16  | 0.022 | 0.017  | 0.065  | 0.090  | 5.91                                                                 | 1.70               | 0.933                           | 0.028              | 3.25  |
|                   | A8             | 0.146                                                                    | 0.087 | 0.059 | 0.069 | 0.018  | 0.013  | 0.047  | 9.29                                                                 | 3.20               | 0.775                           | 0.045              | 5.27  |
|                   | A9             | 0.142                                                                    | 0.080 | 0.062 | 0.067 | 0.013  | 0.028  | 0.034  | 9.68                                                                 | 3.57               | 0.960                           | 0.040              | 5.11  |
|                   | A10            | 0.195                                                                    | 0.11  | 0.088 | 0.086 | 0.021  | 0.055  | 0.033  | 8.84                                                                 | 3.14               | 0.705                           | 0.050              | 4.95  |
|                   | B1             | 0.0509                                                                   | 0.029 | 0.022 | 0.027 | 0.0016 | 0.013  | 0.0093 | 2.28                                                                 | 0.722              | 0.162                           | 0.025              | 1.37  |
|                   | B2             | 0.151                                                                    | 0.11  | 0.045 | 0.10  | 0.0023 | 0.011  | 0.034  | 3.42                                                                 | 1.23               | 0.488                           | 0.028              | 1.68  |
|                   | B3             | 0.776                                                                    | 0.30  | 0.47  | 0.17  | 0.13   | 0.25   | 0.22   | 4.03                                                                 | 1.39               | 0.756                           | 0.010              | 1.87  |
|                   | B4             | 0.255                                                                    | 0.057 | 0.20  | 0.040 | 0.017  | 0.11   | 0.087  | 6.49                                                                 | 2.03               | 1.08                            | 0.013              | 3.37  |
|                   | B5             | 0.358                                                                    | 0.073 | 0.28  | 0.034 | 0.039  | 0.097  | 0.19   | 8.63                                                                 | 2.20               | 2.02                            | 0.065              | 4.34  |
|                   | B6             | 0.417                                                                    | 0.049 | 0.37  | 0.018 | 0.031  | 0.11   | 0.26   | 7.70                                                                 | 2.03               | 1.65                            | 0.012              | 4.00  |
|                   | B7             | 0.482                                                                    | 0.047 | 0.43  | 0.026 | 0.021  | 0.27   | 0.16   | 8.63                                                                 | 2.51               | 1.72                            | 0.011              | 4.38  |
|                   | B8             | 0.217                                                                    | 0.060 | 0.16  | 0.046 | 0.014  | 0.084  | 0.073  | 7.85                                                                 | 1.28               | 1.49                            | 0.011              | 5.07  |
|                   | B9             | 0.179                                                                    | 0.085 | 0.093 | 0.065 | 0.020  | 0.048  | 0.045  | 6.38                                                                 | 2.45               | 0.897                           | 0.007              | 3.02  |
|                   | B10            | 0.280                                                                    | 0.15  | 0.13  | 0.12  | 0.024  | 0.069  | 0.065  | 6.75                                                                 | 2.51               | 0.946                           | 0.022              | 3.27  |
|                   | B11            | 0.215                                                                    | 0.064 | 0.15  | 0.042 | 0.023  | 0.071  | 0.079  | 7.03                                                                 | 2.50               | 1.04                            | 0.012              | 3.48  |
|                   | B12            | 0.196                                                                    | 0.076 | 0.12  | 0.055 | 0.021  | 0.044  | 0.076  | 7.39                                                                 | 2.46               | 1.09                            | 0.011              | 3.83  |
|                   | B13            | 0.111                                                                    | 0.047 | 0.063 | 0.033 | 0.014  | 0.030  | 0.033  | 9.28                                                                 | 3.25               | 0.949                           | 0.035              | 5.05  |
|                   | B14            | 0.334                                                                    | 0.22  | 0.12  | 0.18  | 0.043  | 0.029  | 0.086  | 8.89                                                                 | 1.58               | 1.41                            | 0.056              | 5.84  |
|                   | B15            | 0.364                                                                    | 0.23  | 0.14  | 0.18  | 0.052  | 0.053  | 0.083  | 7.56                                                                 | 2.42               | 1.85                            | 0.032              | 3.26  |
| In the wet season | C1             | 0.0435                                                                   | 0.018 | 0.025 | 0.013 | 0.0058 | 0.0060 | 0.019  | 0.953                                                                | 0.0223             | 0.241                           | 0.016              | 0.673 |
|                   | C2             | 0.0462                                                                   | 0.024 | 0.023 | 0.023 | 0.0010 | 0.016  | 0.0067 | 1.37                                                                 | 0.681              | 0.211                           | 0.047              | 0.431 |

|     |        |       |       |       |        |        |        |       |         |       |        |        |
|-----|--------|-------|-------|-------|--------|--------|--------|-------|---------|-------|--------|--------|
| C3  | 0.114  | 0.10  | 0.012 | 0.095 | 0.0068 | 0.0077 | 0.0043 | 0.825 | 0.344   | 0.341 | 0.011  | 0.127  |
| C4  | 0.0770 | 0.033 | 0.044 | 0.018 | 0.014  | 0.0091 | 0.035  | 0.864 | 0.293   | 0.187 | 0.012  | 0.372  |
| C5  | 0.0796 | 0.024 | 0.055 | 0.017 | 0.0068 | 0.017  | 0.039  | 0.950 | 0.384   | 0.303 | 0.0049 | 0.257  |
| C6  | 0.0864 | 0.021 | 0.066 | 0.018 | 0.0021 | 0.029  | 0.037  | 0.859 | 0.035   | 0.260 | 0.012  | 0.551  |
| C7  | 0.0844 | 0.023 | 0.062 | 0.020 | 0.0026 | 0.0091 | 0.053  | 1.09  | 0.026   | 0.266 | 0.025  | 0.774  |
| C8  | 0.104  | 0.050 | 0.053 | 0.046 | 0.004  | 0.015  | 0.038  | 1.54  | 1.15    | 0.374 | 0.0040 | 0.0121 |
| C9  | 0.107  | 0.078 | 0.029 | 0.034 | 0.044  | 0.010  | 0.019  | 0.681 | 0.00134 | 0.290 | 0.012  | 0.378  |
| C10 | 0.106  | 0.081 | 0.025 | 0.049 | 0.032  | 0.0077 | 0.017  | 0.804 | 0.222   | 0.293 | 0.0049 | 0.284  |
| D1  | 0.0687 | 0.022 | 0.047 | 0.014 | 0.0078 | 0.0084 | 0.039  | 1.42  | 0.808   | 0.450 | 0.013  | 0.153  |
| D2  | 0.0718 | 0.025 | 0.047 | 0.018 | 0.0063 | 0.018  | 0.029  | 1.20  | 0.731   | 0.279 | 0.033  | 0.154  |
| D3  | 0.0854 | 0.035 | 0.051 | 0.028 | 0.0068 | 0.016  | 0.035  | 1.38  | 0.437   | 0.279 | 0.016  | 0.646  |
| D4  | 0.100  | 0.028 | 0.072 | 0.019 | 0.0094 | 0.036  | 0.036  | 1.72  | 0.442   | 0.225 | 0.18   | 0.878  |
| D5  | 0.0870 | 0.026 | 0.061 | 0.023 | 0.0026 | 0.038  | 0.023  | 1.48  | 0.588   | 0.228 | 0.027  | 0.639  |
| D6  | 0.683  | 0.653 | 0.030 | 0.59  | 0.061  | 0.025  | 0.0055 | 1.78  | 0.505   | 0.485 | 0.0055 | 0.786  |
| D7  | 0.130  | 0.024 | 0.11  | 0.017 | 0.0068 | 0.039  | 0.067  | 10.4  | 3.99    | 0.350 | 0.22   | 5.88   |
| D8  | 0.168  | 0.11  | 0.054 | 0.11  | 0.0005 | 0.021  | 0.033  | 6.31  | 0.0665  | 0.298 | 0.010  | 5.94   |
| D9  | 0.180  | 0.15  | 0.030 | 0.14  | 0.012  | 0.028  | 0.0018 | 7.39  | 1.79    | 0.301 | 0.019  | 5.28   |
| D10 | 0.158  | 0.073 | 0.085 | 0.062 | 0.012  | 0.0084 | 0.076  | 1.40  | 0.507   | 0.385 | 0.026  | 0.481  |
| D11 | 0.214  | 0.16  | 0.050 | 0.16  | 0.0042 | 0.041  | 0.0088 | 2.91  | 0.954   | 0.382 | 0.042  | 1.53   |
| D12 | 0.190  | 0.11  | 0.076 | 0.098 | 0.016  | 0.040  | 0.037  | 1.99  | 0.663   | 0.322 | 0.0029 | 1.00   |
| D13 | 0.188  | 0.17  | 0.023 | 0.15  | 0.015  | 0.011  | 0.012  | 3.33  | 0.325   | 0.515 | 0.0055 | 2.49   |
| D14 | 0.153  | 0.048 | 0.11  | 0.037 | 0.011  | 0.039  | 0.066  | 2.65  | 0.888   | 0.369 | 0.16   | 1.23   |
| D15 | 0.174  | 0.060 | 0.11  | 0.056 | 0.0047 | 0.051  | 0.063  | 3.68  | 0.785   | 0.390 | 0.021  | 2.49   |

**Table S5.** The content of total nitrogen and phosphorus and their fractions in surface sediments.

| Water Period      | Sampling Point | Total Phosphorus and Phosphorus Fractions<br>in Surface Sediments (mg·kg <sup>-1</sup> ) |       |       |        |       |       |       | Total Nitrogen and Nitrogen Fractions<br>in Surface Sediments (mg·kg <sup>-1</sup> ) |                                    |                                    |       |
|-------------------|----------------|------------------------------------------------------------------------------------------|-------|-------|--------|-------|-------|-------|--------------------------------------------------------------------------------------|------------------------------------|------------------------------------|-------|
|                   |                | STP                                                                                      | Ex-P  | BD-P  | NaOH-P | HCl-P | OP    | STN   | EN-NO <sub>3</sub> <sup>-</sup> -N                                                   | EN-NH <sub>4</sub> <sup>+</sup> -N | EN-NO <sub>2</sub> <sup>-</sup> -N | HN    |
| In the dry season | A1             | 898.6                                                                                    | 0.842 | 21.99 | 171.1  | 682.1 | 421.2 | 596.5 | 21.29                                                                                | 45.28                              | 0.35                               | 403.8 |
|                   | A2             | 921.3                                                                                    | 2.12  | 87.70 | 94.75  | 659.8 | 377.2 | 793.0 | 30.56                                                                                | 27.79                              | 0.42                               | 654.9 |
|                   | A3             | 1157                                                                                     | 1.00  | 66.32 | 192.2  | 784.2 | 386.6 | 1279  | 47.86                                                                                | 38.09                              | 0.71                               | 1158  |
|                   | A4             | 1163                                                                                     | 6.89  | 63.76 | 153.4  | 766.2 | 441.9 | 833.7 | 22.25                                                                                | 63.18                              | 0.39                               | 734.9 |
|                   | A5             | 1350                                                                                     | 6.70  | 45.31 | 146.0  | 812.7 | 754.7 | 862.7 | 13.50                                                                                | 26.57                              | 0.43                               | 810.2 |
|                   | A6             | 821.5                                                                                    | 1.13  | 39.89 | 109.7  | 551.7 | 187.3 | 756.7 | 15.63                                                                                | 23.31                              | 0.29                               | 594.5 |
|                   | A7             | 1195                                                                                     | 5.34  | 49.51 | 155.2  | 757.3 | 288.2 | 909.6 | 32.97                                                                                | 33.21                              | 0.89                               | 780.9 |
|                   | A8             | 1294                                                                                     | 9.02  | 54.49 | 298.5  | 596.6 | 293.7 | 1536  | 26.43                                                                                | 42.98                              | 1.1                                | 1458  |
|                   | A9             | 1310                                                                                     | 10.5  | 68.67 | 275.0  | 574.5 | 453.0 | 769.0 | 18.10                                                                                | 45.55                              | 0.73                               | 672.9 |
|                   | A10            | 1280                                                                                     | 10.0  | 77.52 | 170.5  | 833.6 | 226.3 | 767.3 | 8.616                                                                                | 39.99                              | 0.29                               | 662.1 |
|                   | B1             | 2219                                                                                     | 4.69  | 38.21 | 25.75  | 1411  | 373.9 | 1342  | 14.35                                                                                | 29.80                              | 0.40                               | 1096  |
|                   | B2             | 1439                                                                                     | 31.4  | 43.16 | 51.88  | 1028  | 57.78 | 2131  | 71.43                                                                                | 87.36                              | 0.53                               | 940.0 |
|                   | B3             | 1517                                                                                     | 15.7  | 116.5 | 228.4  | 812.3 | 295.4 | 1386  | 20.78                                                                                | 86.68                              | 0.93                               | 980.7 |
|                   | B4             | 1378                                                                                     | 15.6  | 53.10 | 125.2  | 777.2 | 229.4 | 1316  | 38.68                                                                                | 62.65                              | 1.4                                | 800.1 |
|                   | B5             | 1422                                                                                     | 2.05  | 84.93 | 61.30  | 1105  | 159.8 | 2282  | 28.35                                                                                | 124.8                              | 1.6                                | 3005  |
|                   | B6             | 1580                                                                                     | 6.76  | 40.12 | 115.0  | 1144  | 52.33 | 737.2 | 4.799                                                                                | 39.17                              | 0.41                               | 452.4 |
|                   | B7             | 1894                                                                                     | 6.39  | 39.77 | 90.26  | 1684  | 109.4 | 650.7 | 7.277                                                                                | 40.93                              | 1.5                                | 370.3 |
|                   | B8             | 1641                                                                                     | 5.18  | 111.4 | 146.5  | 1068  | 145.1 | 642.9 | 19.64                                                                                | 29.93                              | 0.68                               | 434.1 |
|                   | B9             | 1691                                                                                     | 10.3  | 95.32 | 195.7  | 1075  | 537.8 | 1018  | 14.91                                                                                | 24.37                              | 2.2                                | 592.2 |
|                   | B10            | 2861                                                                                     | 3.87  | 22.71 | 89.72  | 1708  | 478.6 | 468.2 | 7.790                                                                                | 37.13                              | 0.56                               | 263.0 |
|                   | B11            | 1619                                                                                     | 4.74  | 33.94 | 124.6  | 1095  | 116.8 | 1025  | 23.44                                                                                | 45.55                              | 0.81                               | 768.0 |
|                   | B12            | 1826                                                                                     | 4.01  | 32.87 | 97.34  | 1360  | 276.3 | 671.9 | 7.500                                                                                | 31.97                              | 0.70                               | 441.4 |
| B13               | 1623           | 3.72                                                                                     | 82.76 | 99.29 | 1100   | 264.7 | 583.7 | 11.58 | 152.3                                                                                | 1.0                                | 235.1                              |       |
| B14               | 1554           | 3.54                                                                                     | 47.10 | 125.3 | 1086   | 197.4 | 761.7 | 15.76 | 154.0                                                                                | 1.6                                | 319.5                              |       |
| B15               | 1595           | 7.12                                                                                     | 36.44 | 108.9 | 1298   | 169.6 | 1083  | 16.43 | 147.6                                                                                | 2.7                                | 744.8                              |       |
| In the wet season | C1             | 1085                                                                                     | 8.11  | 12.67 | 57.57  | 844.2 | 222.2 | 716.5 | 29.29                                                                                | 7.81                               | 0.42                               | 661.7 |
|                   | C2             | 1024                                                                                     | 3.06  | 15.19 | 100.5  | 708.5 | 80.48 | 1039  | 8.527                                                                                | 36.04                              | 0.51                               | 975.5 |
|                   | C3             | 1400                                                                                     | 22.1  | 55.49 | 196.0  | 844.9 | 157.9 | 1541  | 2.254                                                                                | 26.68                              | 0.53                               | 1494  |

|     |       |      |       |       |       |       |       |       |       |      |       |
|-----|-------|------|-------|-------|-------|-------|-------|-------|-------|------|-------|
| C4  | 975.3 | 5.73 | 23.76 | 168.2 | 613.6 | 77.57 | 1080  | 24.46 | 68.76 | 1.2  | 961.4 |
| C5  | 1312  | 9.06 | 32.47 | 282.9 | 604.5 | 343.9 | 1414  | 12.50 | 30.89 | 0.58 | 1285  |
| C6  | 1281  | 10.2 | 26.38 | 152.3 | 867.2 | 154.3 | 915.7 | 10.63 | 37.81 | 0.37 | 834.6 |
| C7  | 1428  | 17.6 | 49.43 | 400.2 | 563.6 | 335.7 | 1346  | 15.45 | 52.61 | 0.57 | 1197  |
| C8  | 887.3 | 17.1 | 41.38 | 175.2 | 459.2 | 30.88 | 919.6 | 6.049 | 31.70 | 0.38 | 869.8 |
| C9  | 1067  | 15.7 | 52.49 | 229.8 | 439.4 | 279.7 | 1105  | 5.223 | 44.87 | 0.78 | 1025  |
| C10 | 1818  | 13.1 | 54.83 | 313.6 | 986.4 | 367.3 | 1087  | 16.47 | 20.57 | 1.2  | 829.5 |
| D1  | 1312  | 1.23 | 91.43 | 21.51 | 1163  | 71.67 | 422.4 | 9.777 | 28.44 | 0.52 | 328.7 |
| D2  | 950.4 | 5.66 | 65.08 | 201.5 | 579.0 | 90.14 | 542.4 | 3.125 | 41.75 | 0.62 | 496.3 |
| D3  | 1502  | 2.23 | 65.12 | 26.49 | 1380  | 179.5 | 599.9 | 11.94 | 91.30 | 0.29 | 491.8 |
| D4  | 1569  | 5.58 | 65.10 | 50.55 | 1411  | 90.61 | 500.6 | 8.304 | 47.99 | 0.19 | 426.3 |
| D5  | 1226  | 4.06 | 45.39 | 79.08 | 977.2 | 147.4 | 419.1 | 7.054 | 107.7 | 1.6  | 215.3 |
| D6  | 1107  | 11.6 | 45.40 | 94.02 | 752.5 | 302.2 | 447.5 | 3.594 | 109.7 | 2.1  | 164.9 |
| D7  | 1158  | 7.25 | 58.23 | 183.3 | 742.8 | 110.8 | 675.8 | 4.442 | 34.14 | 0.55 | 525.7 |
| D8  | 2547  | 17.4 | 49.57 | 351.7 | 1733  | 456.9 | 865.0 | 12.37 | 55.73 | 0.42 | 519.7 |
| D9  | 1580  | 12.5 | 44.14 | 223.1 | 896.3 | 368.0 | 742.2 | 13.66 | 55.86 | 0.85 | 597.3 |
| D10 | 1543  | 14.8 | 55.31 | 164.8 | 999.3 | 133.8 | 609.4 | 5.938 | 34.41 | 0.45 | 431.5 |
| D11 | 1979  | 21.5 | 52.36 | 170.9 | 1697  | 43.84 | 493.9 | 8.594 | 102.6 | 0.66 | 401.9 |
| D12 | 1748  | 14.5 | 39.79 | 201.2 | 1269  | 391.2 | 689.7 | 17.12 | 107.8 | 0.82 | 466.7 |
| D13 | 1662  | 8.98 | 48.35 | 134.3 | 1310  | 69.63 | 440.3 | 16.74 | 85.19 | 0.36 | 323.3 |
| D14 | 1119  | 10.7 | 32.79 | 116.6 | 882.1 | 55.06 | 608.3 | 13.66 | 31.97 | 0.30 | 508.6 |
| D15 | 1478  | 1.47 | 34.75 | 96.09 | 1131  | 399.0 | 467.1 | 6.027 | 116.1 | 0.34 | 339.8 |
